# Supplementary material for: Genetic Diversity of Loquat (Eriobotrya Japonica) Revealed Using RAD-Seq SNP Markers
Source: Research Square preprint supplement (doi:10.21203/rs.3.rs-1331382/v1), 2022-02-15
Supplement: Supplementary file 1 [file 23d370a9474088382bf33286.xlsx]

## Sheet: Table 1
Table 1. Loquat accessions used in this study.
Sample No.	Accession name	Origina		Year of introduction	JP number	Group
1	Wanhong	China	Cultivar	1986	203047	1
2	Hongganben	China	Cultivar	1984	202861	1
3	Deyexiangdun	China	Cultivar	1987	203034	1
4	Dahongpao	China	Cultivar	1987	202855	1
5	Changhong3hao	China	Cultivar	1984	203042	1
6	Houshanwanshou	China	Cultivar	1989	202862	1
7	Baisha	China	Cultivar	1984	118665	1
8	Xiyexiangdun	China	Cultivar	1987	203038	1
9	Baozhu	China	Cultivar	1987	203033	1
10	Huabao2hao	China	Cultivar	1983	202863	1
11	Guangdong	China	Cultivar	1973	175204	1
12	Xialoubaimi	China	Cultivar	1989	203049	1
13	Xialou	China	Cultivar	1989	203048	1
14	Jiajiao	China	Cultivar	1983	202866	1
15	Dazhong	China	Cultivar	1989	175200	1
16	Banhong	China	Cultivar	1989	203041	1
17	Qingzhong	China	Cultivar	1983	202885	1
18	Shanghaipipa	China	Cultivar	1989	203045	1
19	Baiyu	China	Cultivar	1983	175202	1
20	Biqibai	China	Cultivar	1983	115579	1
21	Meihuaxia	China	Cultivar	1989	203044	1
22	Amakusagokuwase	Japan	Cultivar	1974	175201	1
23	Amakusawase	Japan	Cultivar	1974	115578	1
24	Amamishiro	Japan	Cultivar	1990	203096	1
25	Fukuharawase	Japan	Cultivar	1975	172437	1
26	Fukujyuin	Japan	Cultivar	1975	172438	1
27	Fusahikari	Probably of 'Mizuho'× x'Tanaka' bred by SPHI, Japan	Cultivar	1982	172439	1
28	Hondawase	Probably of seedling of open-pollinated 'Mogi', Japan	Cultivar	1952	174614	1
29	Ikeda	Japan	Cultivar	1974	176930	1
30	Kusunoki	Japan	Cultivar	1970	113114	1
31	Mizuho	Probably of 'Tanaka' ×'Kusunoki' bred by NIFTS, Japan	Cultivar	1970	175196	1
32b	Mogi	Japan	Cultivar	1952	171486	1
33b	Mogi	Same as No. 32	Cultivar	1952	171486	1
34b	Mogi	Same as No. 32	Cultivar	1952	171486	1
35b	Mogi	Same as No. 32	Cultivar	1952	171486	1
36b	Mogi	Same as No. 32	Cultivar	1952	171486	1
37	Morimoto	Probable bud sport mutant of 'Tanaka', Japan	Cultivar	1974	175195	1
38	Moriowase	Probable bud sport mutant of 'Mogi', Japan	Cultivar	1963	176755	1
39	Nagasakiwase	Probably of Mogi' × 'Hondawase' bred by AFTDC in 1976, Japan	Cultivar	-	171484	1
40	Nagasakiwase	Same as No. 39	Cultivar	-	171484	1
41	Natsutayori	Probably of 'Nagasakiwase' × 'Fukuharawase' bred by AFTDC in 2009, Japan	Cultivar	-	-	1
42	Obusa	Probably of 'Tanaka' × 'Kusunoki' bred by NIFTS, Japan	Cultivar	1973	113116	1
43	Shiromogi	Probable seedling from an open-pollinated 'Mogi' seed irradiated with gamma rays bred by AFTDC in 1982, Japan	Cultivar	-	118667	1
44b	Shiromogi	Same as No. 43	Cultivar	-	118667	1
45	Suzukaze	Probably of 'Kusunoki' × 'Mogi' bred by AFTDC in 1999, Japan	Cultivar	-	227924	1
46	Tanaka	Japan	Cultivar	1954	171485	1
47	Togoshi	Probably of 'Mogi' × 'Tanaka' bred by SPHI, Japan	Cultivar	1970	174612	1
48	Toi	Japan	Cultivar	1973	176931	1
49	Tomifusa	Probably of 'Tsukumo' × 'Mizuho' bred by SPHI in 1989, Japan	Cultivar	-	203052	1
50	Tsukumo	Prpbably of 'Mogi' × 'Tanaka' bred by NIFTS, Japan	Cultivar	1970	175197	1
51	Yougyoku	Probably of 'Mogi' × 'Morimoto' bred by AFTDC in 1999, Japan	Cultivar	-	227925	1
52	Kawatana mamebiwa No. 1	Collected in Nagasaki, Japan	Strain	2004	-	1
53	Mamebiwa	Collected in Nagasaki, Japan	Strain	1973	117499	1
54	Oita 4	Collected in Oita, Japan	Strain	1975	227943	1
55	Sado 2	Collected in Niigata, Japan	Strain	1977	227952	1
56	Sado 3	Collected in Niigata, Japan	Strain	1977	227953	1
57	Tsushima 12	Collected in Nagasaki, Japan	Strain	1977	-	1
58	Tsushima 15	Collected in Nagasaki, Japan	Strain	1977	-	1
59	Yamaguchi 7S-176	Collected in Yamaguchi, Japan	Strain	1978	-	1
60	Advance	USA	Cultivar	1972	169063	1
61	Fukui 1	Collected in Fukui, Japan	Strain	1976	227947	3
62	Fukui 2	Collected in Fukui, Japan	Strain	1976	227948	3
63	Fukui 3	Collected in Fukui, Japan	Strain	1976	227949	3
64	Fukui 4	Collected in Fukui, Japan	Strain	1976	227950	3
65	Fukui 5	Collected in Fukui, Japan	Strain	1976	227951	3
66	Oita 1	Collected in Nagasaki, Japan	Strain	1975	227940	3
67	Oita 2	Collected in Oita, Japan	Strain	1975	227941	3
68	Oita 6	Collected in Oita, Japan	Strain	1975	227945	3
69	Sado 10	Collected in Niigata, Japan	Strain	1977	227959	3
70	Sado 5	Collected in Niigata, Japan	Strain	1977	227955	3
71	Sado 7	Collected in Niigata, Japan	Strain	1977	227956	3
72	Vietnam loquat Col. No. 97-1	Vietnam	Strain	1997	227933	2
73	Vietnam loquat Col. No. 97-3	Vietnam	Strain	1997	227934	2
74	Vietnam loquat Col. No. 97-4	Vietnam	Strain	1997	227935	2
75	Vietnam loquat Col. No. 97-6	Vietnam	Strain	1997	227936	2
76	Vietnam loquat Col. No. 97-7	Vietnam	Strain	1997	227937	2
77	Vietnam loquat Col. No. 97-8	Vietnam	Strain	1997	227938	2
78	Akko1	Israel	Cultivar	1986	203039	2
79	Akko13	Israel	Cultivar	1986	203040	2
80	Big Jim	USA	Cultivar	1990	203053	2
81	Heads Mamuth	Israel	Cultivar	1987	203036	2
82	Zikim	Israel	Cultivar	1986	203050	2
83	Success	Israel	Cultivar	1987	203037	2
84	Yehuda	Israel	Cultivar	1986	203046	2
85	Zrifin8	Israel	Cultivar	1986	203051	2
86	Greece loquat Col. No. 87-70	Greece	Strain	1987	203095	2
87	Greece loquat Col. No. 87-58	Greece	Strain	1987	178592	2
88	Greece loquat Col. No. 87-67	Greece	Strain	1987	203092	2
89	Greece loquat Col. No. 87-68	Greece	Strain	1987	203093	2
90	Greece loquat Col. No. 87-69	Greece	Strain	1987	203094	2
91	Champagne	USA	Cultivar	1972	169064	2
92	Gold Nugett	USA	Cultivar	1972	116933	2
93	Mexican loquat No. 1	Mexico	Strain	1978	176756	2
94	Mexican loquat No. 2	Mexico	Strain	1978	176757	2
95	Mexican loquat No. 3	Mexico	Strain	1978	176758	2
Table 1. Loquat accessions used in this study. aAFTDC:Agricultural and Forestry Technical Development Center, Nagasaki Prefectural Government. SPHI:Southern Prefectural Horticulture Institute, Chiba Prefectural Agriculture and Forestry Research Center. NIFTS: NARO Institute of Fruit Tree Science. bTechnical replicates.

## Sheet: Table 2
Table 2. Pairwise Fst values among the three groups.
	Group 2	Group 3
Group 1	0.103	0.0798
Group 2		0.202

## Sheet: Table 3
Table 3. Population genetic statistics.
	Mean expected heterozygosity	Mean value of π	Mean measure of FIS
Group 1	0.243	0.245	0.177
Group 2	0.288	0.295	0.178
Group 3	0.158	0.167	0.100

## Sheet: Table 4
Table 4. Heterozygosity conservation in pairs of samples.
		Number of variable sites	Number of conserved heterozygous sites	%
'Mogi' (No. 32)	'Mogi' (No. 33)	237	233	98.3122
'Mogi' (No. 32)	'Mogi' (No. 34)	229	223	97.3799
'Mogi' (No. 32)	'Mogi' (No. 35)	248	239	96.371
'Mogi' (No. 32)	'Mogi' (No. 36)	250	243	97.2
'Tanaka' (No.46)	'Morimoto' (No. 37)	386	375	97.1503
'Mogi' (No. 32)	'Moriowase' (No. 38)	594	117	19.697
'Moriowase' (No. 38)	'Amakusagokuwase' (No. 22)	375	356	94.9333
'Moriowase' (No. 38)	'Amakusawase' (No. 23)	350	330	94.2857
'Amakusagokuwase' (No. 22)	'Amakusawase' (No. 23)	309	302	97.7346
